# Supplementary material for: Cancer-associated fibroblasts drive CXCL13 production in activated T cells via TGF-beta
Source: Front Immunol. 2023 Jul 13;14:1221532. doi: 10.3389/fimmu.2023.1221532 (PMC10373066; doi:10.3389/fimmu.2023.1221532)
Supplement: Supplementary file 5 [file Table_1.xlsx]

## Sheet: Sheet1
	REAGENT or RESOURCE	SOURCE	IDENTIFIER
	APC-Cy™7 Mouse Anti-Human CD45	BD	BD Biosciences Cat# 557833, RRID:AB_396891Clone 2D1
	Alexa Fluor® 700 anti-human CD3 antibody, BioLegend	Biolegend	BioLegend Cat# 300424, RRID:AB_493741 Clone UCHT1
	Brilliant Violet 421™ anti-human CD8 antibody, BioLegend	Biolegend	BioLegend Cat# 344748, RRID:AB_2629584 Clone SK1
	Brilliant Violet 711™ anti-human CD4 antibody, BioLegend	Biolegend	BioLegend Cat# 317440, RRID:AB_2562912 Clone OKT4
	Brilliant Violet 605™ anti-human CD39 antibody	Biolegend	BioLegend Cat# 328236, RRID:AB_2750430 Clone A1
	PE anti-human CD279 (PD-1) antibody	Biolegend	BioLegend Cat# 329905, RRID:AB_940481 Clone EH12.2H7
	PE/Dazzle™ 594 anti-human CD366 (Tim-3) antibody	Biolegend	BioLegend Cat# 345034, RRID:AB_2565886 Clone F38-2E2
	CD90 Antibody, anti-human, VioBlue®, REAfinity™	Miltenyi	Miltenyi Biotec Cat# 130-114-866, RRID:AB_2726816 Clone [REA897]
	PerCPcy5.5 anti-Human TIGIT antibody	Biolegend	Biolegend Cat # 372717 RRID:AB_2632932 Clone A15153G
	PE-Dazzle anti-human CXCR5 antibody	Biolegend	Biolegend Cat # 356927 RRID:AB_2563688 Clone j252D4
	APC-anti-human CXCL13 antibody	Biolegend	RnD Cat # IC801A RRID:AB_2086048 Clone 53610
	APC-anti-human Tox antibody	Miltenyi	Miltenyi Cat # 130-118-335 RRID:AB_2751485 Clone REA473
	APC REA-isotype control	Miltenyi	Miltenyi cat # 130-120-709 RRID:AB_2784399 Clone REA293
	PE-anti-human CD137 antibody	Biolegend	Biolegend Cat # 309804 RRID:AB_314783 Clone 4B4-1
	PerCPcy5.5 anti-human BCL6 antibody	Biolegend	Biolgend Cat # 358507 RRID:AB_2566191 Clone 7D1
	AF488 anti-human Foxp3 antibody	Biolegend	Biolegend Cat # 320112 RRID:AB_430883 Clone 206D
	PE anti-human IFN-gamma antibody	Biolegend	BioLegend Cat# 502509, RRID:AB_315234 Clone 4S.B3
	Alexa Fluor(R) 488 anti-human TNF-alpha antibody	Biolegend	BioLegend Cat# 502915, RRID:AB_493121 clone 2A5
	Anti-IL-2	RnD	RnD Cat # MAB202-SP RRID:AB_2264789 Clone 5334
	BV605 Mouse IgG1, κ Isotype Control antibody	BD	BD Biosciences Cat# 562652, RRID:AB_2714005 Clone X40
	PE anti-human FOXP3 antibody	Biolegend	BioLegend Cat# 320108, RRID:AB_492986 Clone 206D
	Brilliant Violet 711™ anti-human IL-2 antibody	Biolegend	BioLegend Cat# 500345, RRID:AB_2616638 Clone MQ1-17H12
	PerCP/Cyanine5.5 Rat IgG1, κ Isotype Ctrl Antibody	Biolegend	Biolegend Cat# 400426 Clone RTK 7021
	Alexa Fluor® 488 Mouse IgG1, κ Isotype Ctrl (FC) Antibody	Biolegend	Biolegend Cat# 400129 Clone MOPC-21
	APC Rat IgG2a, κ Isotype Ctrl Antibody	Biolegend	BioLegend Cat# 400512, RRID:AB_2814702 Clone [RTK2758]
	PE Mouse IgG1, κ Isotype Ctrl Antibody	Biolegend	BioLegend Cat# 400112, RRID:AB_2847829Clone MOPC-21
	APC-conjugated Anti-human FAP	RnD	RnD Cat # FAB3715A RRID:AB_2884010
	AF488 -conjugated anti-human CD29	Biolegend	Biolegend Cat # 303016 RRID:AB_493025
	APC-cy7-conjugated anti-human Podoplanin	Biolegend	Biolegend Cat # 337030 RRID:AB_2750290
	Human TruStain FcX™ (Fc Receptor Blocking Solution) antibody	Biolegend	BioLegend Cat# 422302, RRID:AB_2818986
	APC/Cyanine7 anti-human IL-17A antibody	Biolegend	BioLegend Cat# 512319, RRID:AB_10612577 Clone BL168
	InVivoMAb mouse IgG1 isotype control	BioXCell	BioXCell Cat#BE0083 Clone MOPC-21 RRID: AB_1107784
	InVivoMAb mouse IgG2b isotype control	BioXCell	BioXCell Cat#BE0086 Clone MPC-11 RRID AB_1107791
	Fixation Buffer	Biolegend	Biolegend Cat # 420801
	Zombie UV Viability Kit	Biolegend	Biolegend Cat # 423108
	One comp eBeads	Thermo Fisher	Thermor Fisher Cat # 01-1111-42
	Cytofix / cytoperm Fixation/Permeabilization Solution Kit	BD	BD Cat # 554714
	HBSS	Gibco	Gibco Cat # 14170-088
	PBS - cal - mg	Gibco	Gibco Cat # 14190-094
	RPMI	Gibco	Gibco Cat # 31870-025
	DMEM	Gibco	Gibco Cat # 21969-035
	FCS	Gibco	Gibco Cat # 10500-064
	Pen-Strep	Gibco	Gibco Cat # 15140-122
	L-glutamine	Gibco	Gibco Cat # 25030-024
	eBioscience™ Cell Stimulation Cocktail (500X)	Thermo Fisher	Thermo Fisher Cat # 00-4970-93
	Collagenase IV	Worthington	Merck Cat # C5138
	DNAse	Sigma	Merck Cat # DN25
	Lymphoprep	Stem Cell technologies	Stem cell Catalog # 07801
	RBC lysis buffer	Sigma	Merck Cat# 11814389001
	Falcon™ Cell Strainers 100 uM	Thermo Fisher	Falcon Cat # 10282631
	Falcon™ Cell Strainers 70 uM	Thermo Fisher	Falcon Cat # 10788201
	Free Active TGF-b1 ELISA	Biolegend	Biolegend Cat # 437707
	CXCL13 ELISA	RnD	RnD Cat # DY801
